# Supplementary material
Source: PubMed Central journal article supplement (PMC5031653)

1 Supplementary Material

2 Untangling The Environmental from The Dietary: Dust Does Not Matter

3  
4  
5 **Methods**  
6

7 **Controlled-food trials**

8 The controlled-food trials were carried out at the Mourier farm (Limousin region,  
9 France; agreement number B-87-176-01), under the supervision of the *Centre Interrégional*  
10 *d'Information et de Recherche en Production Ovine* (CIIRPO) and the *Institut de l'Elevage*  
11 (Idele). G.M. and D.G. who have official approval to carry out such procedures, designed  
12 these trials. They were performed on domestic sheep (*Ovis aries*), using only ewes from the  
13 *Vendéen* breed. All experiments were conducted on cull ewes, meaning sheep no longer  
14 suitable for breeding and sold for meat. None of the experiments required the sheep to be  
15 handled. Sheep had full access to foods with which they were familiar and none of them were  
16 put down for the sole purpose of the study. As planned by the Mourier farm, cull ewes were  
17 sold for meat after the 70 days experimentation. Due to sanitary and veterinary regulations in  
18 the slaughterhouse, stomach content could not be sampled. All skulls and mandibles of ewes  
19 were prepared and are stored at the IPHEP lab, CNRS and Université de Poitiers, France.

20 All of these ewes spent three months together in the very same grass-dominated pasture  
21 before the experiment started. Given that dental microwear is known to reflect the last few  
22 days or weeks of the dietary habits [1], it was assumed that their dental microwear signatures  
23 prior to beginning the controlled-food trials reflected a homogenous grazing signal [2]. A 5-  
24 day period of adaptation to the diet was proposed. The ewes were kept inside a covered  
25 sheepfold and fed from July 15<sup>th</sup> to October 2<sup>nd</sup> 2014. The sheep were not kept on hay, which  
26 they would have eaten, but on dust-free wood shavings. Feeding troughs were covered with a

27 plastic film and cleaned out daily to avoid contamination. None of the ewes lost weight during  
28 the experiments.

29 Forty sheep were included in this study, divided into four groups of ten. Two 10-ewe  
30 groups were fed on a red clover-dominated silage and the other two groups were fed on a  
31 multispecific assemblage highly dominated by grasses. The red clover-dominated silage is  
32 composed of 12% herbaceous monocots, mostly *Lolium hybridum*, and 88% herbaceous  
33 dicots, including 72% of red clover *Trifolium pratense*. The second fodder is dominated by  
34 Poaceae with 92% herbaceous monocots, mostly *Bromus hordeaceus*, *Festuca arundinacea*,  
35 *Guadinea fragilis*, *Holcus lanatus*, *Poa trivialis*, and *Anthoxanthum odoratum*. Eight percent  
36 of this silage is composed of herbaceous dicots, i.e. forbs.

37 The two sets of fodders were harvested from a 2.5 ha field heavily sown with red  
38 clover (*Trifolium pratense*) in September 2013 and from a 1 ha 15 year old pasture that  
39 underwent several phases of mechanical cutting and sheep grazing every year. In early July  
40 2014, after 81 mm of precipitations spread over June 23th to July 5th, 2014, the two fields  
41 were cut 10 cm above the ground to avoid including grit in the harvest. Also, due to the  
42 precipitations that occurred, the harvest was expected to be free of air-born dust. This has  
43 been double-checked by counting the phytoliths versus exogenous elements after  
44 mineralization by incineration and acid attacks on the two fodders. More than 90 % of the  
45 elements issued from the residues in both clover and grass fodders are indeed phytoliths.  
46 However, the weight of residues is larger for grasses than for clover. The harvest was bale-  
47 wrapped 24 hours after cutting in order to guarantee similar natural physical properties to the  
48 uncut plant throughout the controlled- food testing (percentage of dry matter about 50%).  
49 Silica phytolith and cellulose contents expressed as percentages of dry matter weight for each  
50 fodder, as well as toughness of red clover and of a set of grasses measured on fresh plants are  
51 given in Tables S1 & S2 (see also Fig. S1).

52           The ewes had full access to the food. Ewes were given ~1.650 kg (dry matter weight)  
53 of clover fodder and ~1.550 kg (dry matter weight) of grass fodder per day and per ewe.  
54 These amounts were defined by giving large amounts of fodder and measuring how much the  
55 ewes had consumed in 24 hours.

56           Every day, a load of dust was added to the fodder of one of the 10-ewe samples per  
57 diet category (Table S1). Fodder and dust were placed in large troughs which were cleaned  
58 daily. For several days, the remaining dust was gathered and measured. This showed that  
59 more than 90% of the dust load was ingested by the ewes. The quantity and the properties of  
60 the dust used in the controlled- food testing follow the study of Breuning Madsen & Awadzi  
61 [3]. To our knowledge, this is the only study in inter-tropical latitudes quantifying the dust  
62 deposits on vegetation. It was conducted in Ghana and aimed at quantifying such deposits due  
63 to the Harmattan winds blowing from the Sahara from November to March. The authors  
64 sampled dust on carpets simulating vegetation at 1m, 3m and 7m above the ground at  
65 different spots along a latitudinal transect. In this current study, we focus on simulating dust  
66 accumulation in areas of high primary productivity with high concentrations of wildlife, and  
67 not on more arid areas where dust accumulation would indeed be more important, but wildlife  
68 would also be scarcer. Also, we focus on simulating ungulates feeding on above ground plant  
69 parts and not on species such as suids which forage on underground items with soil particles  
70 [4]. Data for the Guinean savannahs in the Tamale region in Ghana were therefore chosen to  
71 calculate the amount of exogenous particles to be added to the fodder. We use data collected  
72 at 1m above ground. One month of dust accumulation represents on average 3.3 g/m<sup>2</sup>, an  
73 average calculated from 3 consecutive years. Ten ewes forage on approximately 40 m<sup>2</sup> a day.  
74 Consequently, the food was laden with 132 g of dust per 10-ewe sample to simulate the  
75 amount of dust deposited by the Harmattan on a meadow in 30 days.

76 **Preparation, Casting, Scanning**

77 The skulls were prepared following standard procedures in osteological preparation  
78 [5]. Each tooth was carefully cleaned. The facet of interest is located on the disto-labial  
79 enamel band of the protoconid of one of the lower second molars (Fig 1). Molds are then  
80 made using a polyvinylsiloxane elastomer (Regular Body President, ref 6015 - ISO 4823,  
81 medium consistency, polyvinylsiloxane addition type; Coltene Whaledent). This product is  
82 known to be the most efficient one to replicate a given surface [6,7].

83 The molds are then placed under a Leica DCM8 confocal profilometer using white  
84 light confocal technology with a Leica 100× objective (Numerical aperture = 0.90; working  
85 distance = 0.9 mm). The center of the dental facet of interest was sampled (Fig 1). Surface  
86 elevations for each specimen were collected at a lateral (x, y) interval of 0.129 μm with a  
87 vertical numerical step of 1 nm. For each specimen, a surface of 200 × 200 μm (1550 × 1550  
88 points; Fig 1) is scanned and treated through LeicaMap software (Fig 1).

89 Abnormal peaks, due to interferences with air bubbles within the silicone matrix, were  
90 automatically erased with a batch algorithm computed on ImageJ software based on  
91 mathematical morphological tools (Fig. S2). The original surface  $S_0$  is modified using an  
92 opening procedure (combination of erosion and dilatation) with a radius of 9 pixels in order to  
93 remove feature finer than 18 pixels (~2.0 μm). The resulting surface  $S_1$  is subtracted from the  
94 original surface  $S_0$ . From this emerges a surface  $S_2$ , which contains abnormal peaks and the  
95 slight elevation differences between the  $S_0$  and  $S_1$  that correspond to the acquisition noise and  
96 low scale features.  $S_2$  is submitted to a threshold at  $Z = 0.2 \mu\text{m}$  to select only the highest  
97 features corresponding to abnormal peaks. Such a cut-off value was chosen by carefully  
98 identifying the slope change on a frequency histogram of  $Z$  values on  $S_2$ .  $S_3$  contains  $Z$  values  
99 associated with threshold pixels, i.e, the abnormal peaks. The difference between the original  
100 surface  $S_0$  and  $S_3$  generates the final surface  $S_4$ , free of abnormal peaks on which further  
101 analyses are conducted. Such procedures generate surfaces that differ from any surfaces

102 treated by median denoising and gaussian filters which do not erase but partially attenuate the  
103 abnormal peaks and remove low-scale features in conjunction with removing the noise. In the  
104 present analysis, the abnormal peaks are totally erased from  $S_0$ , the rest of the surfaces initial  
105  $S_0$  and final  $S_4$  being strictly identical. Also, this procedure is more efficient and replicable  
106 than manual deletions.

107

### 108 **Cellulose and phytoliths contents, dust load and Total Ingested Silica index**

109 Samples of the clover and grasses fodders were dried and the proportion of cellulose  
110 was quantified: 28.6 % ( $\pm 2.0$  %) of dry weight for the clover-dominated fodder and 28.3 %  
111 ( $\pm 2.1$ %) of dry weight for the grass-dominated fodder. Samples of the clover and grasses  
112 fodders were mineralized and content in Si (exogenous particles and silica phytoliths) was  
113 then quantified by inductively coupled plasma atomic emission spectroscopy. The residues of  
114 clover and grass fodders after mineralization and acid attack were carefully checked to control  
115 potential air-born dust pollution. In the clover fodder, more than 93 % of the particles larger  
116 than 5  $\mu\text{m}$  were silica phytoliths, the rest being quartz grains. In the grass fodder, more than  
117 91% of the particles larger than 5  $\mu\text{m}$  were phytoliths. It is worth noting that in every residue,  
118 micrometric scale clays were present but not counted. Results, given in percentage by dry  
119 weight, were then normalized to obtain how much silica phytoliths one ewe ingested per day  
120 using the total mass of fodder given per ewe (Table S4). This differed according the nature of  
121 the fodder (as dry weight; Clover=1650g/day/ewe; Grasses=1550g/day/ewe, Table S1).

122 The combination of X-ray diffraction, chemical element analysis and phase  
123 quantification was applied to the dust. It was composed of 72% to 74% quartz grains and 18%  
124 to 20% Mg-feldspaths. Clays represent less than 6% and Fe-oxides less than 1%. The dust  
125 load was sieved to retain only grains below 100  $\mu\text{m}$ . The mineralogical composition and grain  
126 size are similar to the conditions met in the Harmattan windblown dust in Ghana [3]. The

127 Total Ingested Silica index is the sum of phytolith weight naturally contained in the plant  
128 tissues cumulated with the quantity of exogenous dust added to the fodder during the trials  
129 (Table S1).

### 130 **Toughness of the plants**

131 Several plants including aerial and underground organs with clumps of earth were  
132 sampled at different locations in the fields from which fodders were harvested. Samples were  
133 carried to the University of Poitiers where the measurements were performed. We measured  
134 the fracture toughness, the ductility, and the ultimate tensile stress of the red clover (stems)  
135 and several specimens of grasses (stems and leaves; Fig. S1). Mechanical behavior was  
136 estimated using tensile tests. The length of the specimens was constant (identical strain rate to  
137 limit any viscous effects) and their mean surface/diameters were estimated by averaging three  
138 points at three different positions. These tests have been performed using a Zwick Z0.5 testing  
139 system fitted with a 50 N load cell (Table S2). The specimen were tested using a strain rate of  
140  $1.5 \times 10^{-3} \text{ s}^{-1}$ . The fracture toughness ( $\text{J} \cdot \text{m}^{-3}$ ) represents the material's ability to absorb  
141 deformation energy per unit volume before failure. This can be estimated qualitatively by  
142 measuring the area under a stress  $\sigma$  strain curve obtained from a tensile test at low strain rate [8].  
143 The fracture toughness values are scattered within the same batch of plant items.  
144 However, grass leaves have the lowest median fracture toughness while stems of clover show  
145 the highest values. The ultimate tensile stress represents the force per unit surface required to  
146 initiate the crack at the failure point. It is worth noting (Table S2) that the leaves of grasses  
147 required much more force than the one required for stems of clover or grasses. However, the  
148 ductility of grass leaves is much lower than the ductility of the stems of either clover or  
149 grasses (Table S2). Sheep have to generate much more force to initiate cracks on grass leaves  
150 than on the other items.

### 151 **Data analysis on Dental Microwear Textures**

152 The analyses were performed using the Scale-Sensitive Fractal Analysis using  
153 Toothfrax and Sfrax software (Surfract, [www.surfract.com](http://www.surfract.com)) following Scott et al. [9].  
154 Photosimulations of all of the 40 surfaces analyzed in this study are shown in Figure S3 and  
155 individual textural parameters are given in Table S3. Four microwear variables are used in  
156 this study (Table S4). Complexity (*Asfc* or Area-scale fractal complexity) is a measure of the  
157 roughness at a given scale (min scale: 0.02  $\mu\text{m}^2$ ; max scale: 7200  $\mu\text{m}^2$ ). Heterogeneity of  
158 complexity (*HAsfc* or heterogeneity of area-scale fractal complexity), quantifies the variation  
159 of complexity observed between within scan. *HAsfc* is calculated through 81 cells. Anisotropy  
160 (*epLsar* or exact proportion of length-scale anisotropy of relief) measures the orientation  
161 concentration of surface roughness (calculated at the scale of 1.8  $\mu\text{m}$ ). Textural fill volume  
162 (*Tfv*) does not depend on the surface shape but on its finer texture. *Tfv* is here estimated as the  
163 difference between the total fill volume generated by cubes with square faces 2  $\mu\text{m}$  per side  
164 minus the structural fill volume generated by cubes with square faces 10  $\mu\text{m}$  per side. All  
165 variables have been described in further details in Scott et al. [9]. It has been shown that wild  
166 grazing bovids tend to have lower values in *Asfc*, *HAsfc* and *Tfv* (less complex and less  
167 heterogeneous textures) and higher in *epLsar* (more anisotropic textures) than browsing  
168 antelopes [10]. It is worth mentioning here that the present ewe data set shows a reverse  
169 pattern for the *Tfv* parameter. Grass-fed ewes have higher *Tfv* than clover-fed ones; the latter  
170 groups simulating leaf browsing and not mixed- or fruit-browsing habits might be the source  
171 of difference between the two studies. Statistical tests were then used in order to highlight  
172 potential differences in dental microwear textural parameters between the dietary groups. As  
173 textural parameters violated conditions for parametric tests, they were rank-transformed  
174 before each analysis [11,12].

175 Two-way factorial ANOVAs (with diet and dust load as factors) for each parameter  
176 were used to determine the sources of significant variation. Jackknife resampling techniques

177 were also used as a further investigation into the solidity of our results. The frequency of  
178 significant p-values was reported. Any potential difference was then highlighted using the  
179 combination of the conservative HSD test (Tukey's Honest Significant Differences) together  
180 with the less conservative LSD test (Fisher's Least Significant Differences; Fig 1; Table 1;  
181 Table S4).

182 A species might be assigned to a dietary category based on a given parameter but plots  
183 with another one when a second parameter is considered. Combining all of the parameters  
184 into a set of linear combinations may offer some help in dietary classification. A principal  
185 component analysis was performed on the four textural parameters and the 40 ewes without  
186 an *a priori* classification. The first component of the analysis carries 46.9% of the variation  
187 seen in the total sample (Table S5). One-way ANOVA highlights significant differences in  
188 coordinates only along PC1 between the different ewe samples. Accordingly, coordinates  
189 along the first component are taken to form the *Wear Textural Index (WTI)*.

190

## 191 References

192

- 193 1. Teaford, M. F. & Oyen, O. J. 1989 In vivo and in vitro turnover in dental microwear. *Am.*  
194 *J. Phys. Anthropol.* **80**, 447-460.
- 195 2. Calandra, I. & Merceron, G. 2016 Dental Microwear Texture Analysis in Mammal  
196 Ecology. *Mammal Rev.* **accepted**.
- 197 3. Breuning-Madsen, H. & Awadzi, T. W. 2005 Harmattan dust deposition and particle size  
198 in Ghana. *CATENA* **63**, 23-38. (doi:10.1016/j.catena.2005.04.001)



- 199 4. Souron, A., Merceron, G., Blondel, C., Brunetière, N., Colyn, M., Hofman-Kami ska, E.  
200 & Boisserie, J.-R. 2015 Three-dimensional dental microwear texture analysis and diet in  
201 extant Suidae (Mammalia: Cetartiodactyla). *Mammalia* **79**, 2796291.
- 202 5. Jakway, G. E., Raskin, W. & Tytte, T. 1970 Sodium perborate process for preparation of  
203 skeletons. *Turtox News* **48**, 65667.
- 204 6. Galbany, J., Estebaranz, F., Martínez, L. M., Romero, A., De Juan, J., Turbón, D. &  
205 Pérez-Pérez, A. 2006 Comparative analysis of dental enamel polyvinylsiloxane  
206 impression and polyurethane casting methods for SEM research. *Microsc. Res. Tech.* **69**,  
207 2466252. (doi:10.1002/jemt.20296)
- 208 7. Goodall, R. H., Darras, L. P. & Purnell, M. A. 2015 Accuracy and Precision of Silicon  
209 Based Impression Media for Quantitative Areal Texture Analysis. *Sci. Rep.* **5**, 10800.  
210 (doi:10.1038/srep10800)
- 211 8. Callister, W. D., Rethwisch, D. G. & others 2007 *Materials science and engineering: an*  
212 *introduction*. Wiley New York. [cited 2016 Jan. 29].
- 213 9. Scott, R. S., Ungar, P., Bergstrom, T. S., Brown, C. A., Childs, B. E., Teaford, M. F. &  
214 Walker, A. 2006 Dental microwear texture analysis: technical considerations. *J. Hum.*  
215 *Evol.* **51**, 3396349.
- 216 10. Scott, J. R. 2012 Dental microwear texture analysis of extant African Bovidae. *Mammalia*  
217 **76**, 1576174.
- 218 11. Conover, W. J. & Iman, R. L. 1981 Rank transformations as a bridge between parametric  
219 and nonparametric statistics. *Am. Stat.* **35**, 1246129.
- 220 12. Sokal, S. R. & Rohlf, F. J. 1969 *Biometry*. New York: W. E. Freeman and Company.



222 **Table S1: Silica and dust measurement.** Bio-silica content, dust load and total ingested  
 223 silica index depending on samples of ewes.

| Samples             | Bio-silica Content (% of dry weight) | Bio-silica Content Total (g/ewe/day) | Dust Load (g/ewe/day) | Total Ingested Silica (g/ewe/day) |
|---------------------|--------------------------------------|--------------------------------------|-----------------------|-----------------------------------|
| Clover - dust-free  | 0.496                                | 8.184                                | 0                     | 8.184                             |
| Clover - dust-laden | 0.496                                | 8.184                                | 13.2                  | 21.384                            |
| Grass - dust-free   | 1.14                                 | 17.67                                | 0                     | 17.67                             |
| Grass - dust-laden  | 1.14                                 | 17.67                                | 13.2                  | 30.87                             |

224

225

226 **Table S2: Food mechanical properties.** Mean, median, standard deviation and extreme  
 227 values of toughness ( $J.m^{-3}$ ), ultimate tensile stress (Mpa), and ductility (%) of the most  
 228 dominant items that compose the foddere given to ewes.

|              |    | Toughness               |        |       |       |        |
|--------------|----|-------------------------|--------|-------|-------|--------|
|              | N  | m                       | median | SD    | min   | max    |
| Grass leaves | 29 | 23.95                   | 22.28  | 12.79 | 3.88  | 54.99  |
| Grass stems  | 18 | 44.84                   | 25.46  | 38.12 | 10.30 | 137.42 |
| Clover stems | 30 | 61.86                   | 53.46  | 32.79 | 7.30  | 145.06 |
|              |    | Ultimate tensile stress |        |       |       |        |
|              | N  | m                       | median | SD    | min   | max    |
| Grass leaves | 29 | 5.68                    | 5.54   | 1.48  | 1.92  | 9.81   |
| Grass stems  | 18 | 3.59                    | 3.15   | 1.37  | 1.64  | 7.60   |
| Clover stems | 30 | 3.98                    | 4.16   | 1.10  | 1.33  | 7.00   |
|              |    | Ductility               |        |       |       |        |
|              | N  | m                       | median | SD    | min   | max    |
| Grass leaves | 29 | 1.98                    | 2.68   | 1.69  | 0.12  | 8.55   |
| Grass stems  | 18 | 9.19                    | 12.33  | 9.54  | 0.77  | 35.22  |
| Clover stems | 30 | 9.78                    | 10.27  | 4.65  | 1.45  | 31.50  |

229

230

231

232 **Table S3: Textural parameters for every single ewe. *Asfc*: Complexity, *HAsfc*:**

233 heterogeneity of complexity, *epLsar*: anisotropy, *Tfv*: Textural fill volume.

| Specimen  | diet   | dust       | <i>Asfc</i> | <i>epLsar</i> ( $\times 10^{-3}$ ) | <i>HAsfc</i> <sub>(81 cells)</sub> | <i>Tfv</i> |
|-----------|--------|------------|-------------|------------------------------------|------------------------------------|------------|
| Ovis10098 | clover | dust-free  | 9.508       | 1.880                              | 2.078                              | 45190.7    |
| Ovis11723 | clover | dust-free  | 2.230       | 1.407                              | 0.735                              | 38011.8    |
| Ovis20939 | clover | dust-free  | 5.871       | 2.427                              | 1.844                              | 17082.1    |
| Ovis31042 | clover | dust-free  | 2.869       | 0.194                              | 0.692                              | 35435.8    |
| Ovis70519 | clover | dust-free  | 10.211      | 0.795                              | 1.371                              | 39398.3    |
| Ovis80140 | clover | dust-free  | 2.573       | 2.888                              | 0.782                              | 29384.0    |
| Ovis80307 | clover | dust-free  | 1.687       | 6.144                              | 1.210                              | 33563.9    |
| Ovis08045 | clover | dust-free  | 6.612       | 3.084                              | 2.898                              | 26618.7    |
| Ovis80729 | clover | dust-free  | 2.719       | 2.593                              | 1.073                              | 43456.5    |
| Ovis90287 | clover | dust-free  | 10.014      | 0.288                              | 1.441                              | 38607.4    |
| Ovis10106 | clover | dust-laden | 3.731       | 0.859                              | 0.924                              | 45184.2    |
| Ovis11707 | clover | dust-laden | 3.124       | 1.231                              | 0.603                              | 2253.4     |
| Ovis20094 | clover | dust-laden | 4.839       | 1.226                              | 0.807                              | 36079.5    |
| Ovis21376 | clover | dust-laden | 5.829       | 1.347                              | 1.000                              | 54650.4    |
| Ovis70379 | clover | dust-laden | 2.484       | 3.548                              | 0.713                              | 43623.4    |
| Ovis80147 | clover | dust-laden | 4.985       | 2.690                              | 1.046                              | 58144.3    |
| Ovis80288 | clover | dust-laden | 2.148       | 2.570                              | 1.042                              | 19106.0    |
| Ovis80748 | clover | dust-laden | 2.831       | 4.471                              | 0.849                              | 47413.1    |
| Ovis90074 | clover | dust-laden | 2.403       | 3.168                              | 0.900                              | 25216.3    |
| Ovis90206 | clover | dust-laden | 3.322       | 3.162                              | 1.468                              | 25151.3    |
| Ovis10053 | grass  | dust-free  | 2.380       | 2.561                              | 1.014                              | 37644.9    |
| Ovis11739 | grass  | dust-free  | 5.495       | 2.511                              | 0.472                              | 42303.3    |
| Ovis20965 | grass  | dust-free  | 2.953       | 1.187                              | 1.157                              | 44859.6    |
| Ovis31028 | grass  | dust-free  | 4.900       | 0.943                              | 1.044                              | 52264.9    |
| Ovis70520 | grass  | dust-free  | 0.895       | 5.163                              | 0.698                              | 37887.4    |
| Ovis07898 | grass  | dust-free  | 5.741       | 11.40                              | 0.899                              | 88990.3    |
| Ovis80133 | grass  | dust-free  | 1.728       | 6.304                              | 0.805                              | 40075.4    |
| Ovis80312 | grass  | dust-free  | 1.389       | 8.192                              | 0.616                              | 38029.6    |
| Ovis80718 | grass  | dust-free  | 1.233       | 6.057                              | 0.545                              | 54016.8    |
| Ovis90455 | grass  | dust-free  | 3.931       | 2.255                              | 1.167                              | 52713.6    |
| Ovis00234 | grass  | dust-laden | 1.133       | 5.104                              | 0.619                              | 40806.3    |
| Ovis08043 | grass  | dust-laden | 2.787       | 1.578                              | 0.392                              | 30823.6    |
| Ovis12772 | grass  | dust-laden | 0.872       | 7.718                              | 0.441                              | 37125.2    |
| Ovis80356 | grass  | dust-laden | 0.979       | 6.125                              | 0.384                              | 46173.0    |
| Ovis90045 | grass  | dust-laden | 1.220       | 8.338                              | 0.453                              | 49253.8    |
| Ovis90256 | grass  | dust-laden | 6.000       | 7.029                              | 0.608                              | 67754.3    |
| Ovis90300 | grass  | dust-laden | 2.144       | 6.230                              | 1.069                              | 59132.3    |
| Ovis90730 | grass  | dust-laden | 1.826       | 4.269                              | 1.111                              | 37926.1    |
| Ovis90764 | grass  | dust-laden | 2.755       | 3.122                              | 1.832                              | 54238.6    |
| Ovis90814 | grass  | dust-laden | 1.434       | 1.405                              | 0.831                              | 25113.0    |

234

235

236

237 **Table S4: Pair wise multicomparisons tests.** Synthesis of the posthoc tests resulting from  
 238 the Jackknife procedure and carried out on clover-fed, grass-fed, dust and dust-free groups.  
 239 Percentages represent the frequency of significant difference (p-value<0.05) over the 40  
 240 iterations. Above the diagonal: Tukey's Honest Significant Difference Test; below the  
 241 diagonal: Fisher's Least Significant Difference test.

| <i>Asfc</i>   |            | Clover    |            | Grass     |            |
|---------------|------------|-----------|------------|-----------|------------|
|               |            | Dust-free | Dust-laden | Dust-free | Dust-laden |
| Clover        | Dust-free  |           | 0.0%       | 0.0%      | 100.0%     |
|               | Dust-laden | 0.0%      |            | 0.0%      | 0.0%       |
| Grass         | Dust-free  | 10.0%     | 0.0%       |           | 0.0%       |
|               | Dust-laden | 100.0%    | 100.0%     | 2.5%      |            |
| <i>epLsar</i> |            | Clover    |            | Grass     |            |
|               |            | Dust-free | Dust-laden | Dust-free | Dust-laden |
| Clover        | Dust-free  |           | 0.0%       | 0.0%      | 82.5%      |
|               | Dust-laden | 0.0%      |            | 0.0%      | 0.0%       |
| Grass         | Dust-free  | 20.0%     | 0.0%       |           | 0.0%       |
|               | Dust-laden | 100.0%    | 95.0%      | 0.0%      |            |
| <i>HAsfc</i>  |            | Clover    |            | Grass     |            |
|               |            | Dust-free | Dust-laden | Dust-free | Dust-laden |
| Clover        | Dust-free  |           | 0.0%       | 0.0%      | 90.0%      |
|               | Dust-laden | 2.5%      |            | 0.0%      | 0.0%       |
| Grass         | Dust-free  | 75.0%     | 0.0%       |           | 0.0%       |
|               | Dust-laden | 100.0%    | 2.5%       | 0.0%      |            |
| <i>Tfv</i>    |            | Clover    |            | Grass     |            |
|               |            | Dust-free | Dust-laden | Dust-free | Dust-laden |
| Clover        | Dust-free  |           | 0.0%       | 0.0%      | 0.0%       |
|               | Dust-laden | 0.0%      |            | 0.0%      | 0.0%       |
| Grass         | Dust-free  | 77.5%     | 0.0%       |           | 0.0%       |
|               | Dust-laden | 5.0%      | 0.0%       | 0.0%      |            |

242

243

244

245 **Table S5: Results of the Principal Component Analysis.** The analysis is conducted with the  
 246 40 ewes without *a priori* diet assignation and with the four textural parameters (a:  
 247 Eigenvalues b: communities r and square communities r<sup>2</sup> between variables and components).  
 248 An ANOVA (c) on ranked individual score is performed on PC1 to PC3 to test significant  
 249 differences between samples of ewes (see also Table 2 in text).

| a)        |            |            |               |            |
|-----------|------------|------------|---------------|------------|
| Component | Eigenvalue | % variance | Û Eigenvalues | Û variance |
| 1         | 1.88       | 46.89      | 1.88          | 46.89      |
| 2         | 1.27       | 31.68      | 3.14          | 78.58      |
| 3         | 0.59       | 14.68      | 3.73          | 93.26      |
| 4         | 0.27       | 6.74       | 4.00          | 100.00     |

250

| b)            |        |                |       |                |        |                |        |                |
|---------------|--------|----------------|-------|----------------|--------|----------------|--------|----------------|
|               | PC1    |                | PC2   |                | PC3    |                | PC4    |                |
|               | r      | r <sup>2</sup> | r     | r <sup>2</sup> | r      | r <sup>2</sup> | r      | r <sup>2</sup> |
| <i>Asfc</i>   | -0.744 | 0.554          | 0.537 | 0.288          | -0.233 | 0.054          | -0.322 | 0.104          |
| <i>epLsar</i> | 0.769  | 0.591          | 0.398 | 0.158          | 0.430  | 0.185          | -0.257 | 0.066          |
| <i>HAsfc</i>  | -0.766 | 0.587          | 0.301 | 0.091          | 0.538  | 0.289          | 0.182  | 0.033          |
| <i>Tfv</i>    | 0.380  | 0.144          | 0.855 | 0.731          | -0.243 | 0.059          | 0.258  | 0.066          |

251

| c)         |    |         |         |         |                 |
|------------|----|---------|---------|---------|-----------------|
|            | df | SS      | MS      | F       | p               |
| <b>PC1</b> |    |         |         |         |                 |
| diet       | 1  | 1742.40 | 1742.40 | 18.1070 | <b>0.000142</b> |
| dust       | 1  | 122.50  | 122.50  | 1.2730  | 0.266           |
| diet*dust  | 1  | 0.90    | 0.90    | 0.0094  | 0.923           |
| Error      | 36 | 3464.20 | 96.23   |         |                 |
| <b>PC2</b> |    |         |         |         |                 |
| diet       | 1  | 90.00   | 90.00   | 0.6382  | 0.429           |
| dust       | 1  | 160.00  | 160.00  | 1.1347  | 0.293           |
| diet*dust  | 1  | 3.60    | 3.60    | 0.0255  | 0.873           |
| Error      | 36 | 5076.40 | 141.01  |         |                 |
| <b>PC3</b> |    |         |         |         |                 |
| diet       | 1  | 40.00   | 40.00   | 0.2799  | 0.600           |
| dust       | 1  | 0.40    | 0.40    | 0.0028  | 0.958           |
| diet*dust  | 1  | 144.40  | 144.40  | 1.0103  | 0.321           |
| Error      | 36 | 5145.20 | 142.92  |         |                 |

252

253

254  
255  
256  
257  
258  
259

**Figure S1.** Schematic representation of the mechanical properties of the three types of food items measured during tensile tests. It is worth to mention that clover is tougher but require less stress to reach the limit between elastic and plastic deformation and that leaves of the grasses we measured are significantly less ductile than the stem of these same plants. The inner structure of the stems arranged as a furrows of multiple layers.

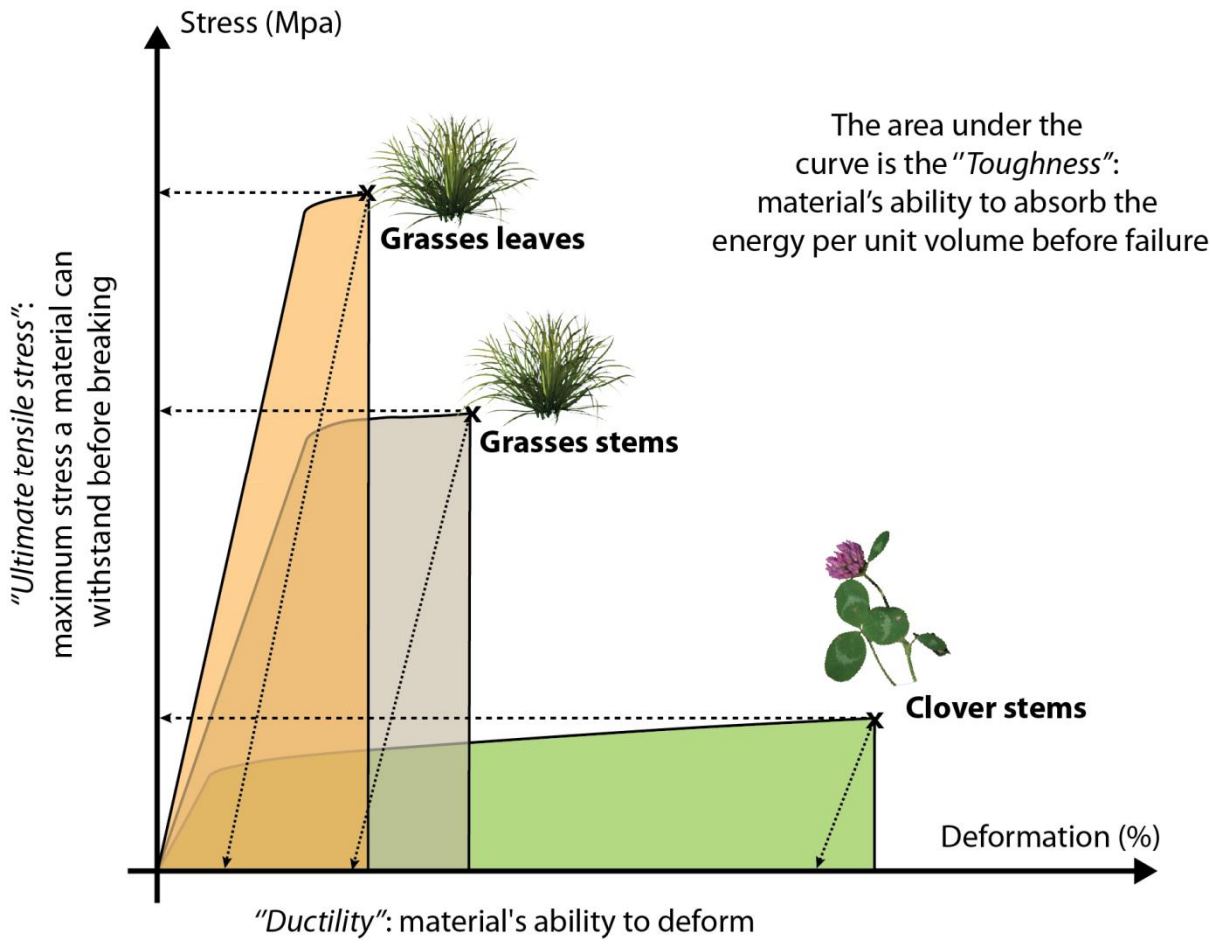

260  
261

262  
 263  
 264  
 265  
 266  
 267  
 268  
 269  
 270  
 271

**Figure S2.** Flow charts showing the bivariate filtering process erasing abnormal peaks. 3D views of a raw surface S0 including abnormal peaks, which are automatically erased by combining mathematical morphological filters (opening) with a height-threshold filter and surface subtraction on ImageJ software. N: number of pixels. Black and Gray frequency histograms representing N and log (N) respectively depending on Z height values. Note that abnormal peaks which represent less than 0.025% of the pixel amount of S0 had a significant effect on textural parameters. All the other pixels are unaffected in Z values.

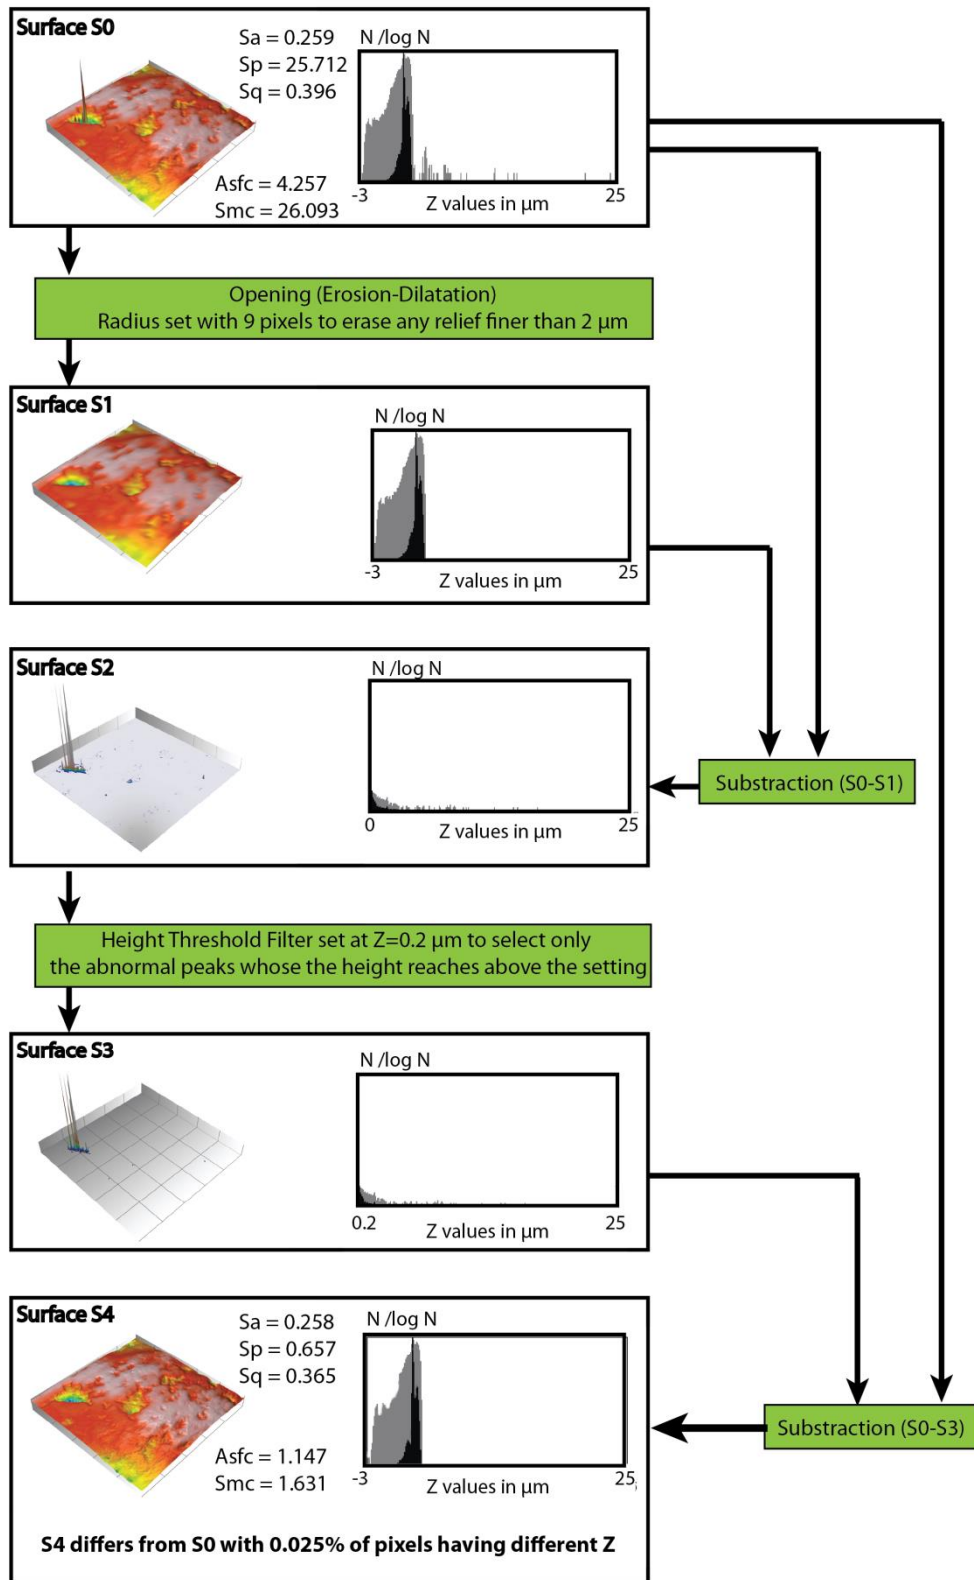



272

273

274

275

276

277

278

279

280

281

282 Figure S3. Photosimulations from the dental wear surfaces of all of the 40 ewes scanned and  
283 analyzed in this study.

284

285

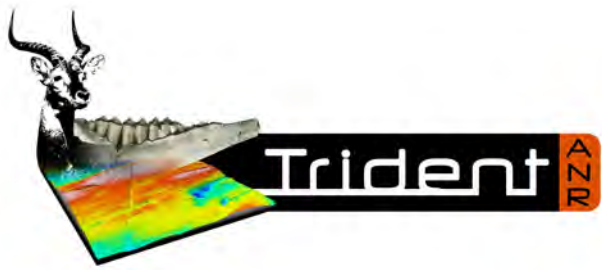

**Clover  
Dust free**

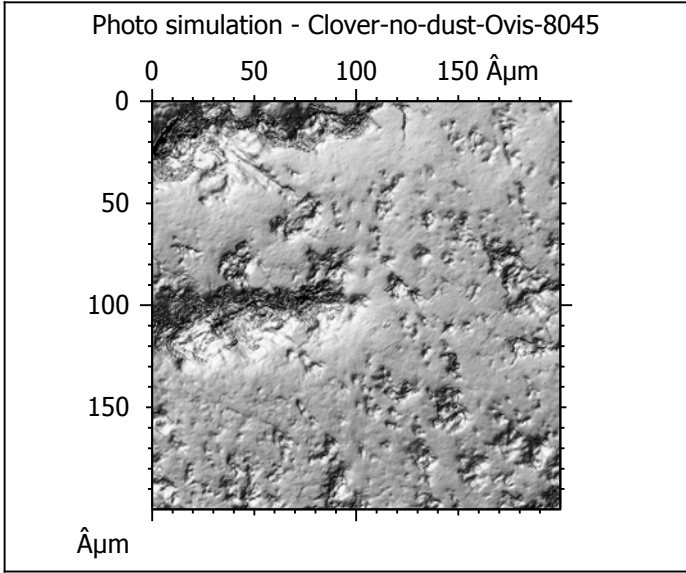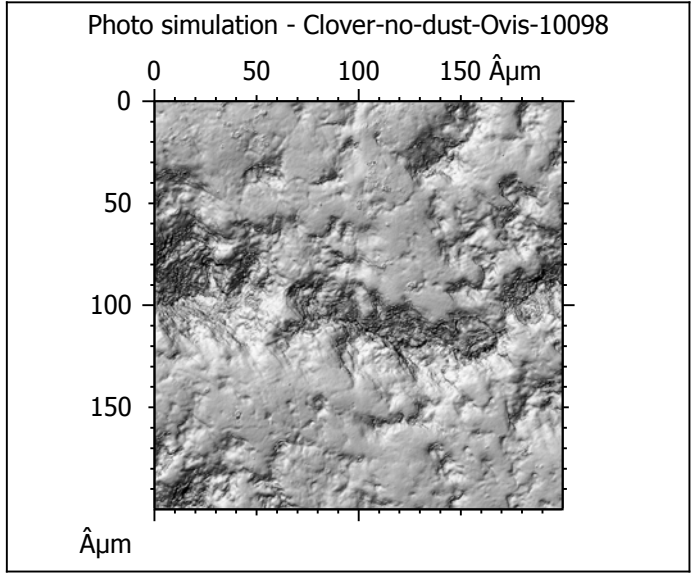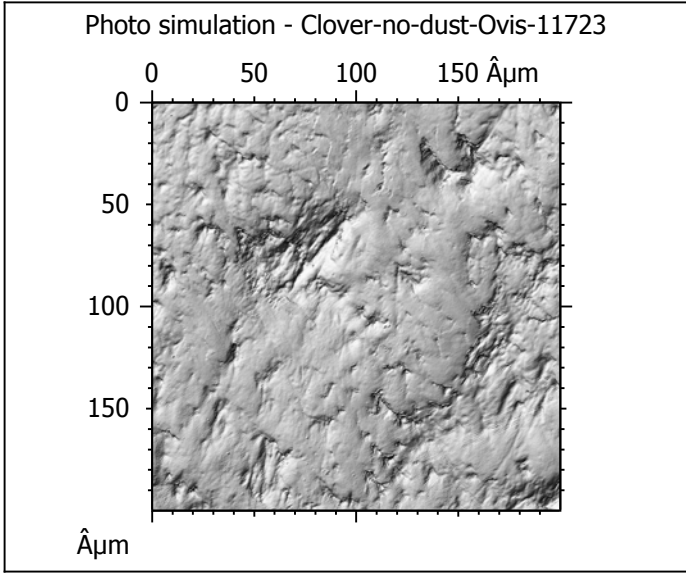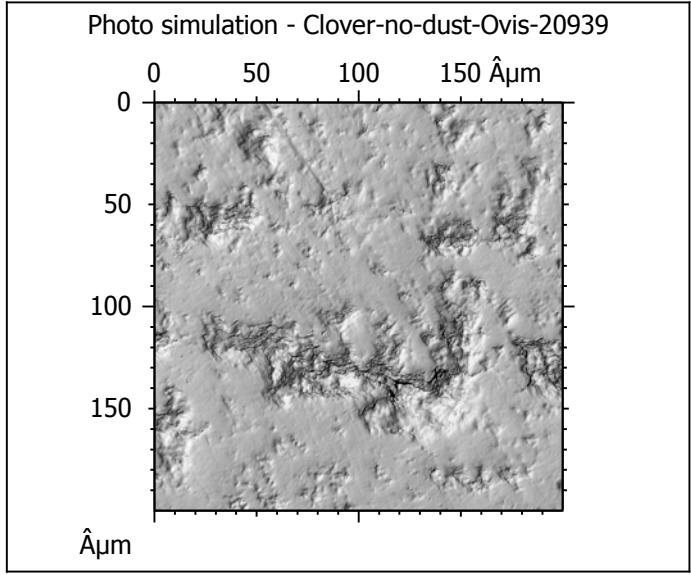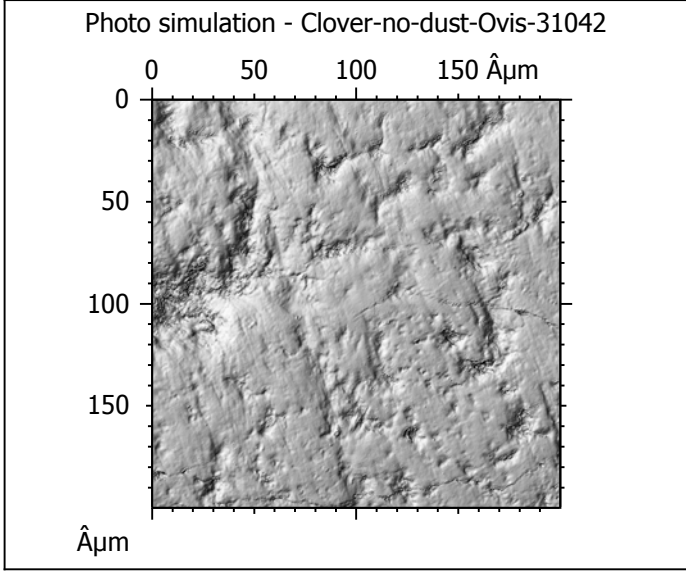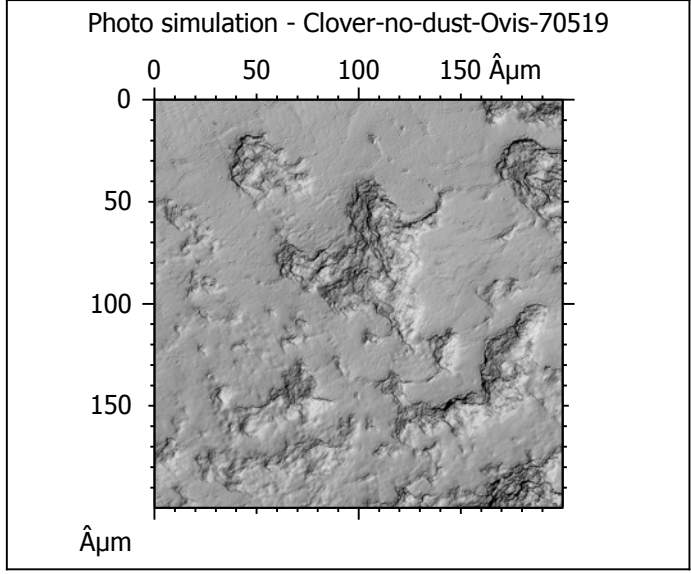

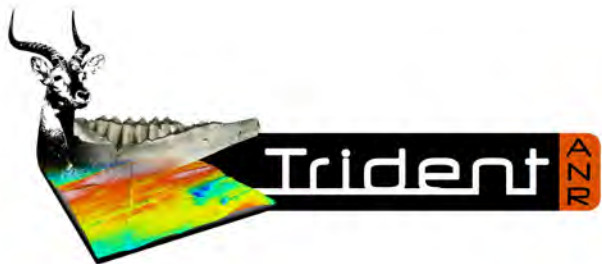

**Clover  
Dust free**

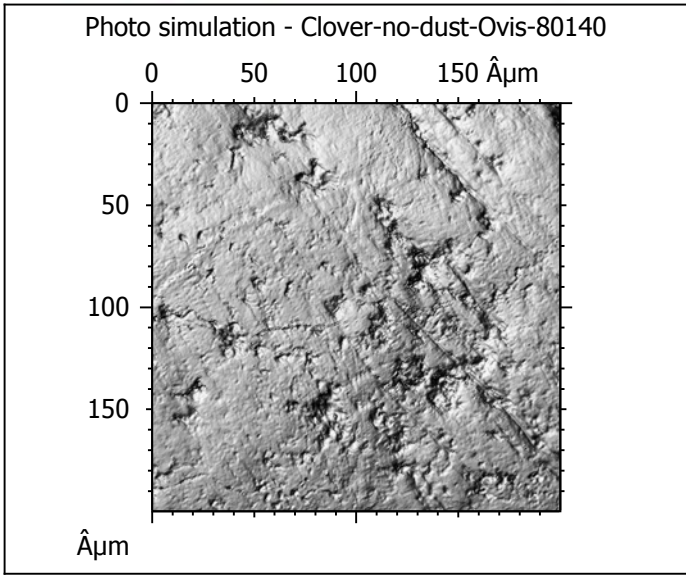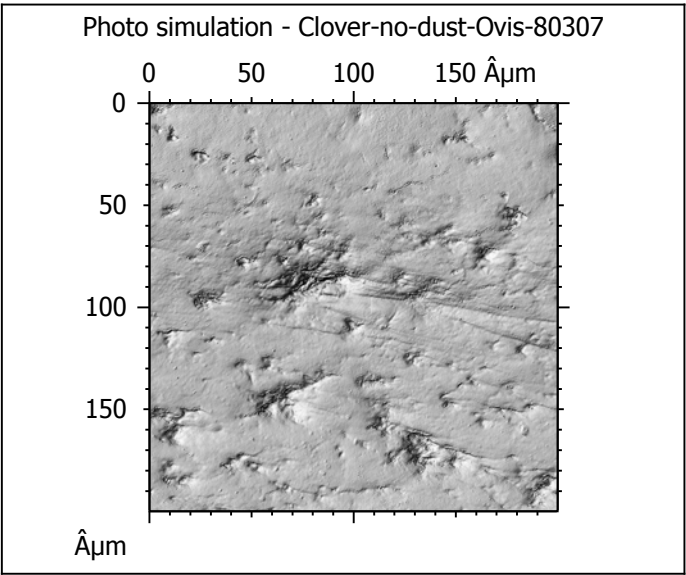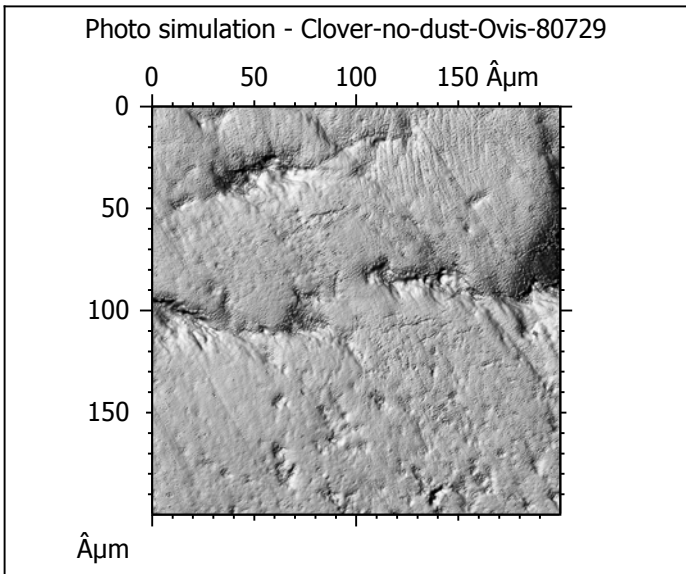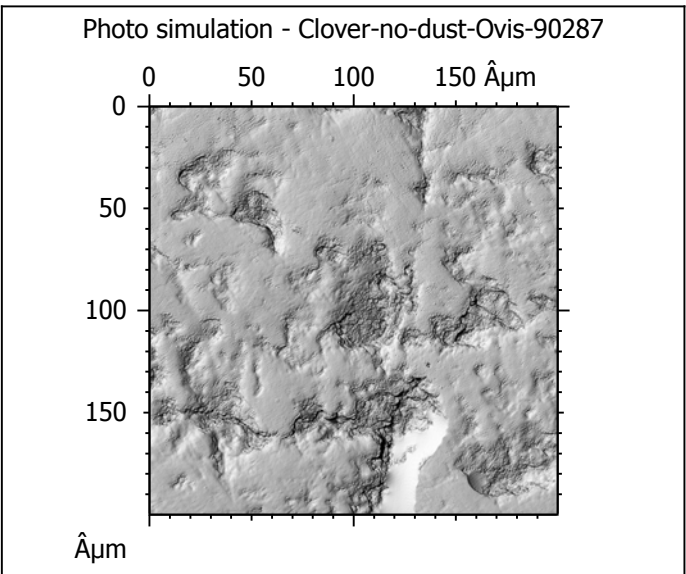



**Grass  
Dust free**

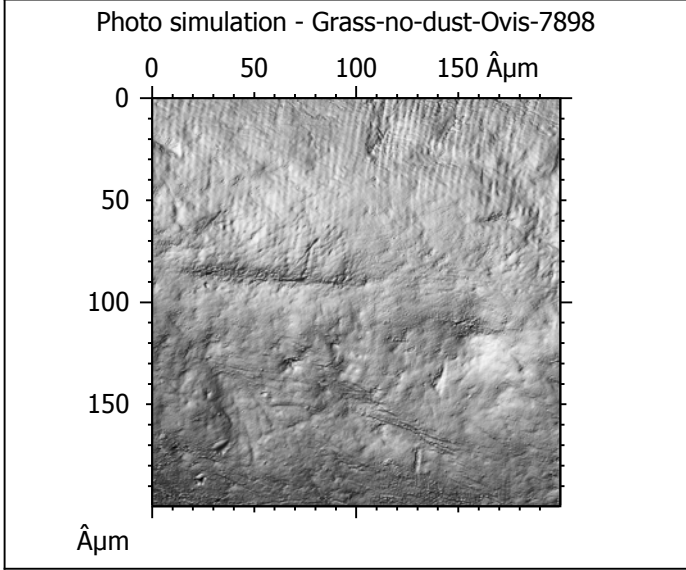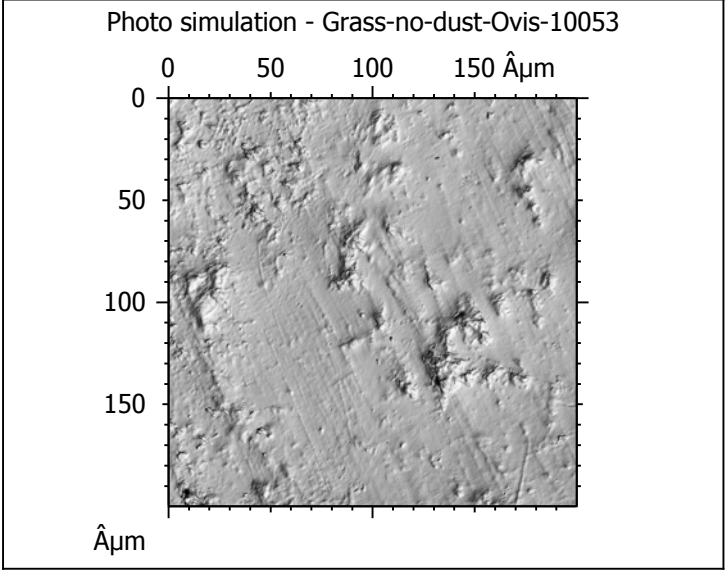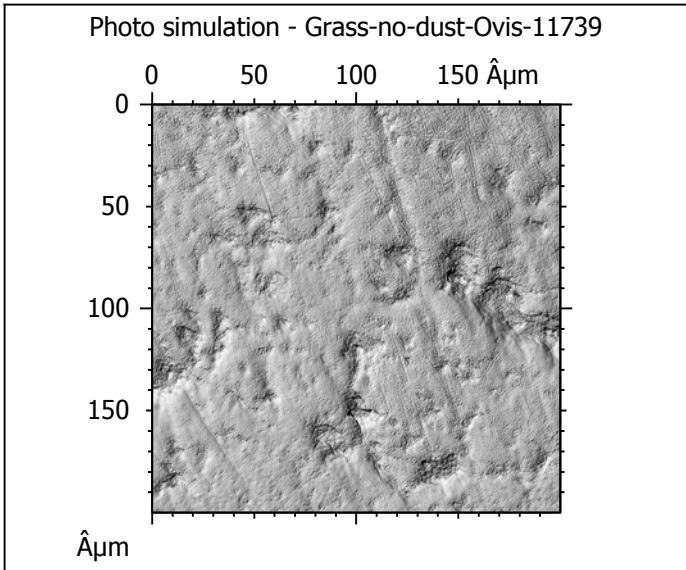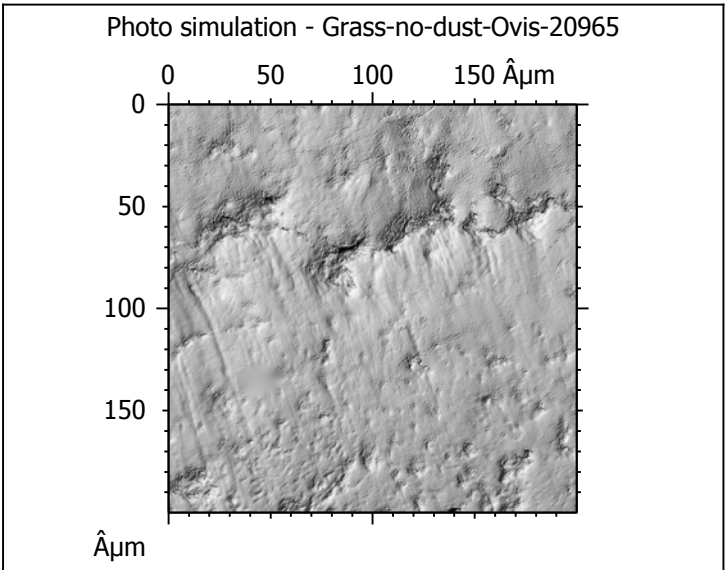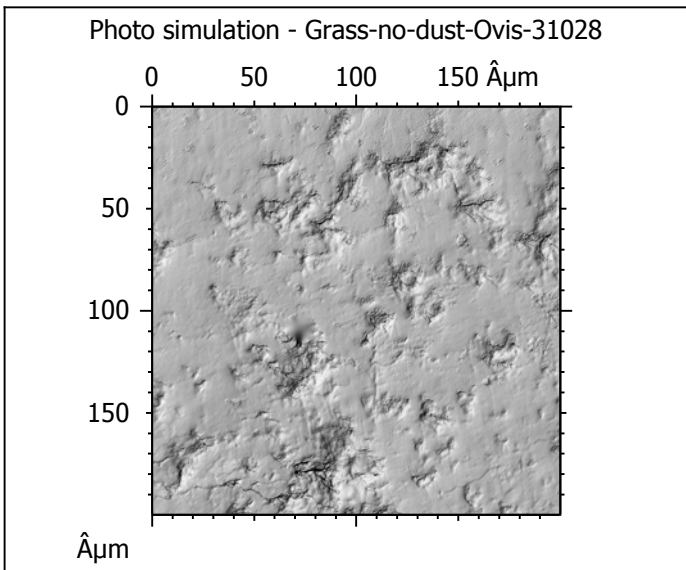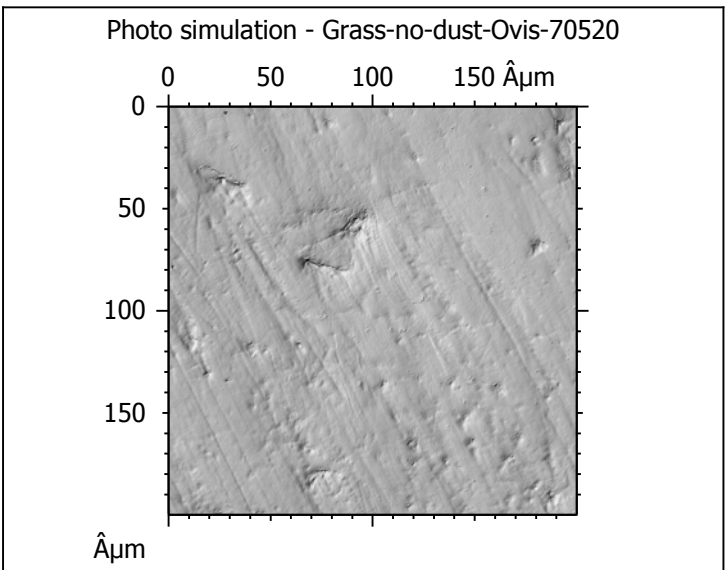



**Grass  
Dust free**

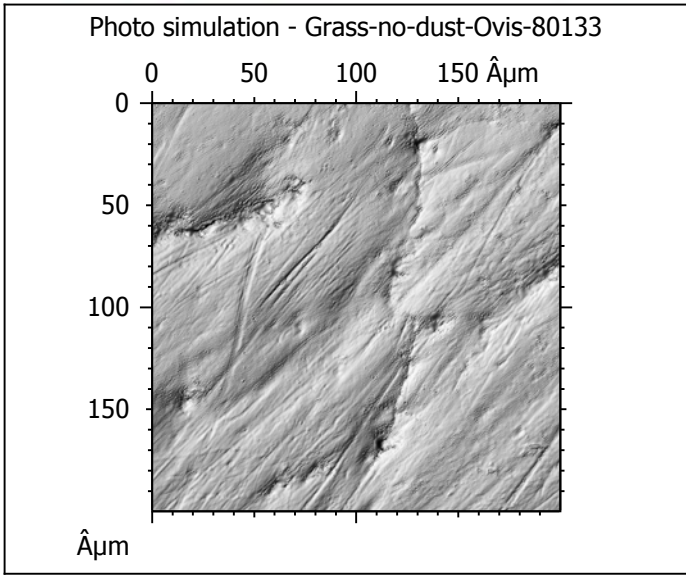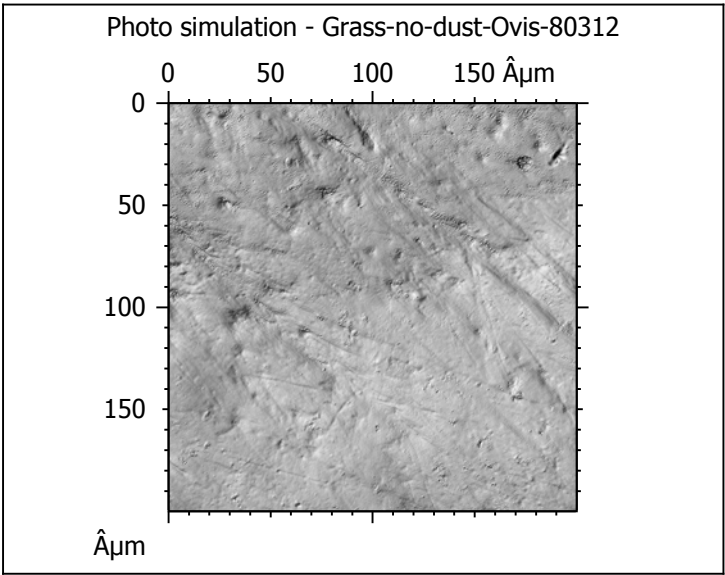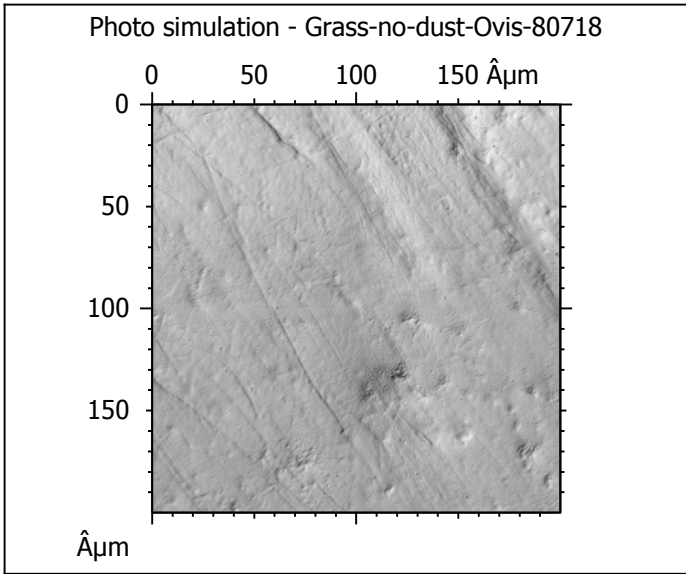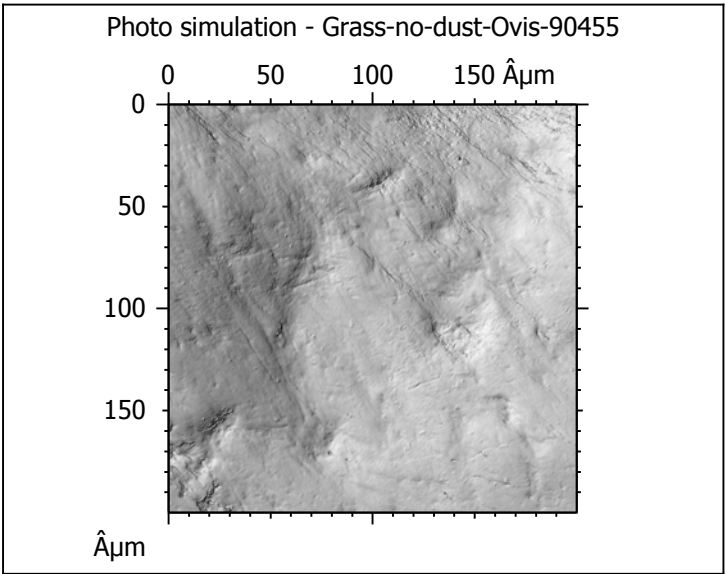



# Clover Dust

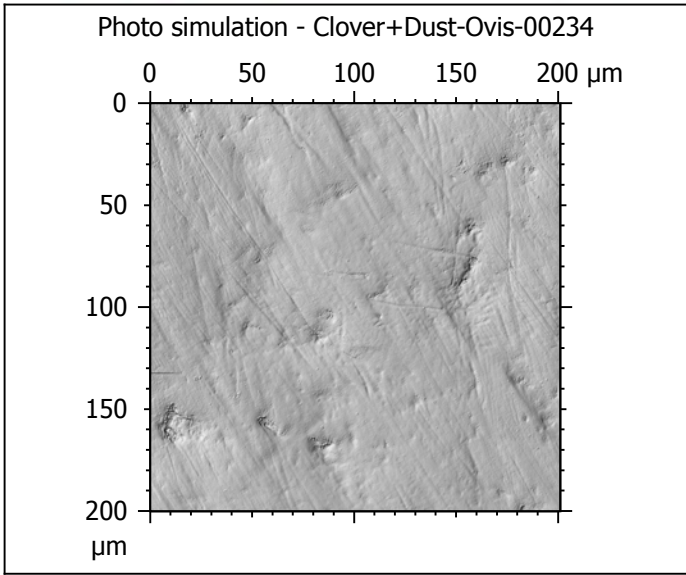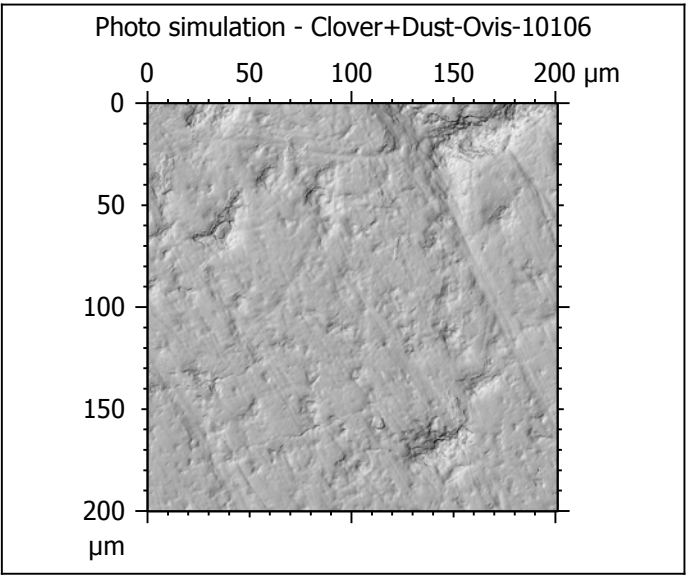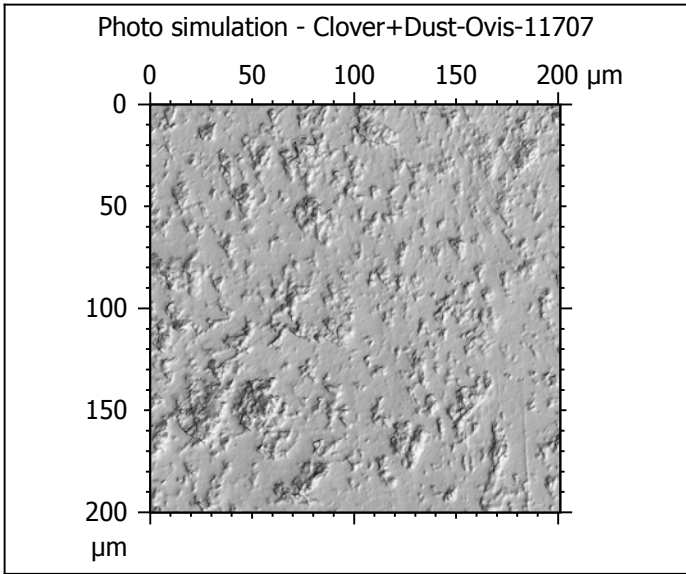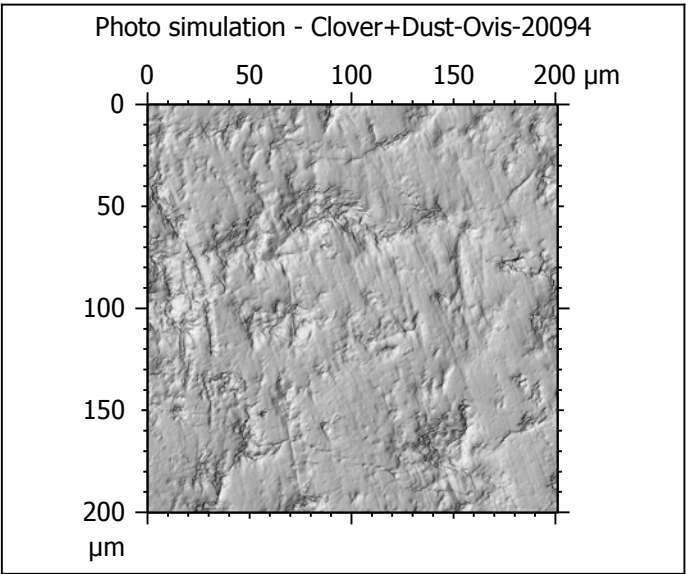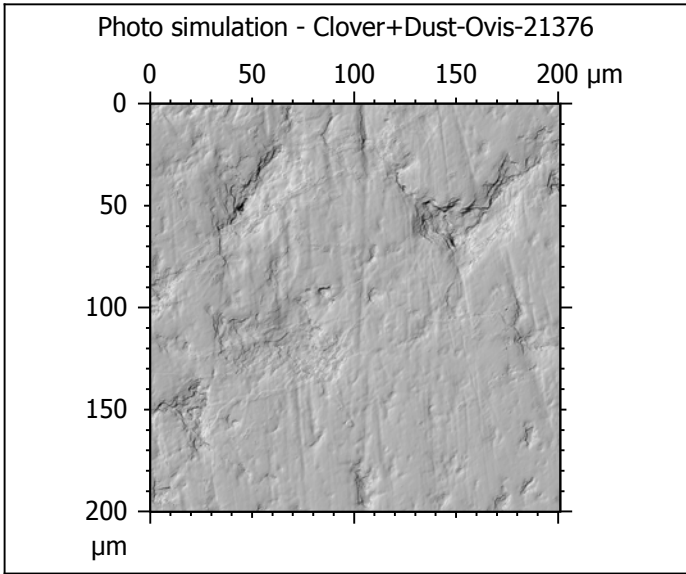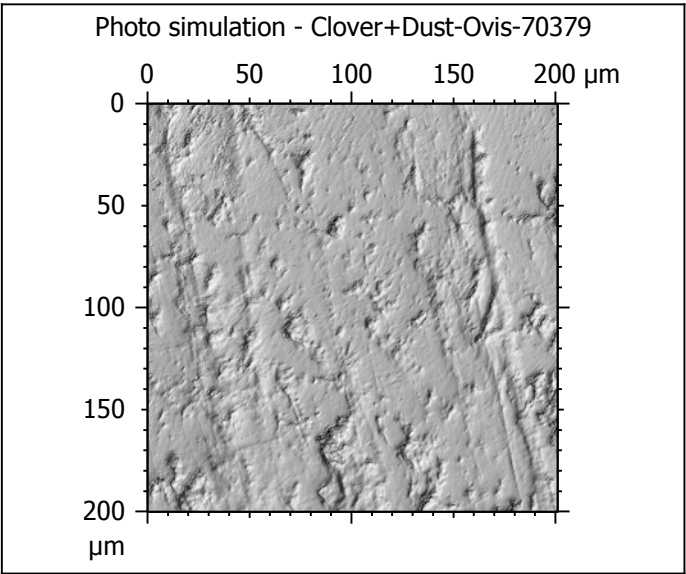



**Clover  
Dust**

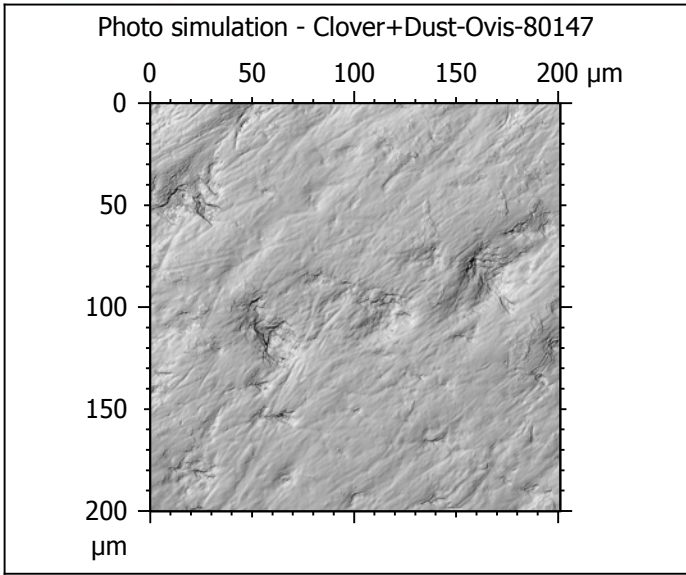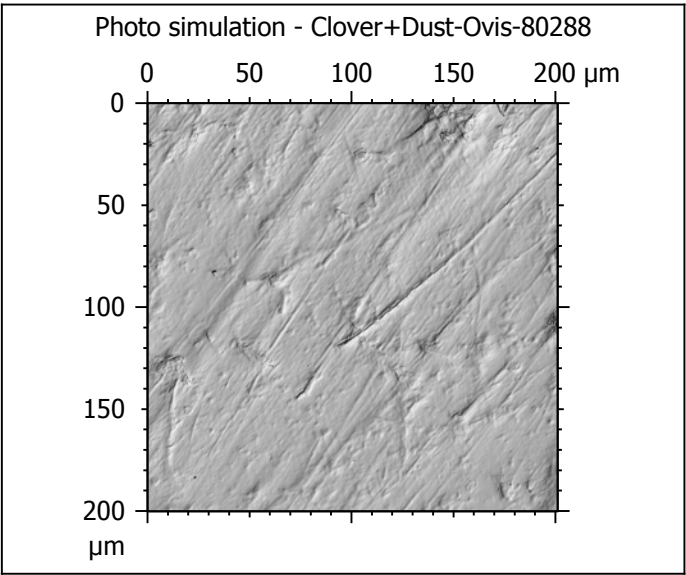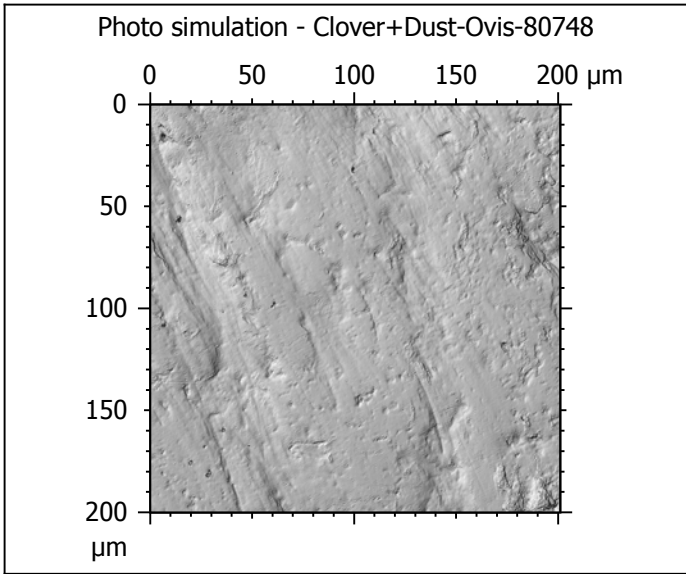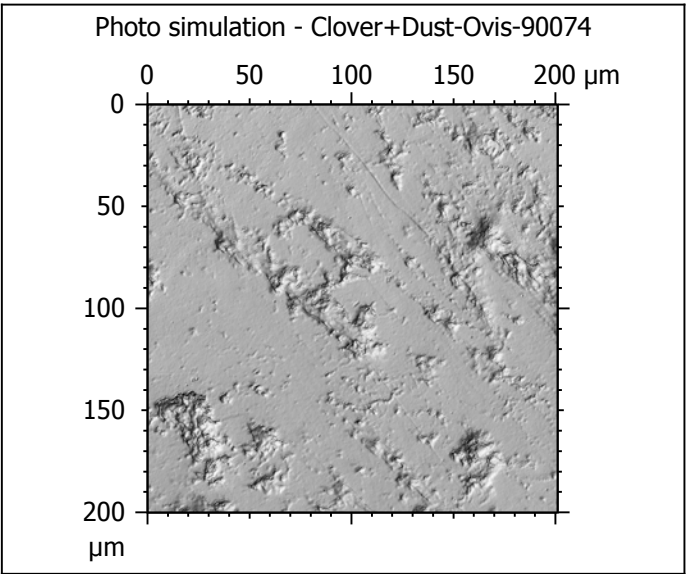



**Grass  
Dust**

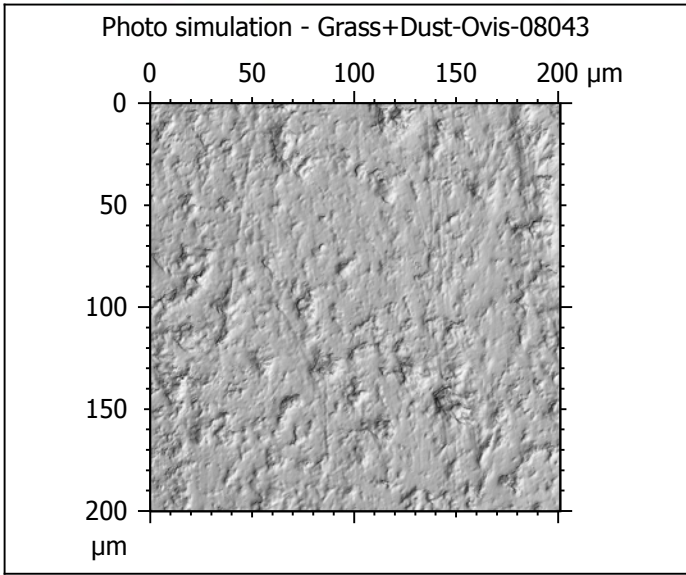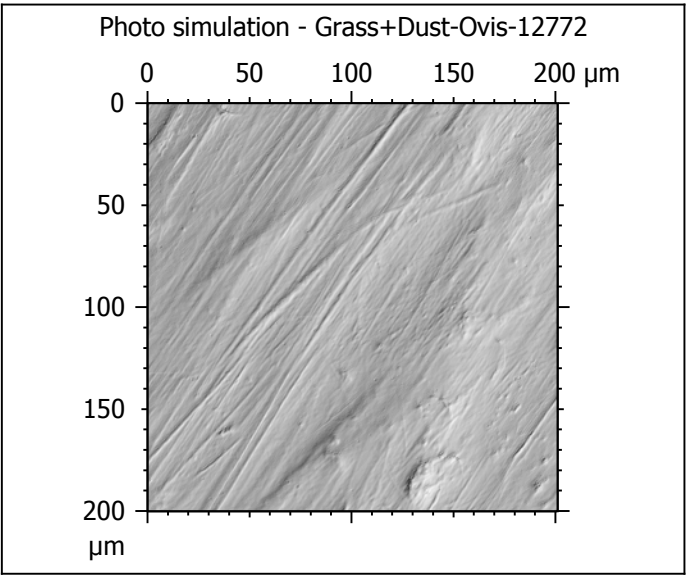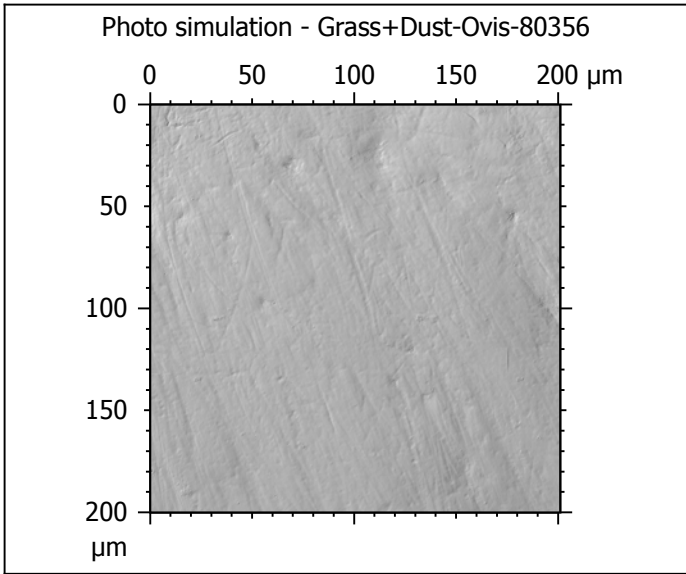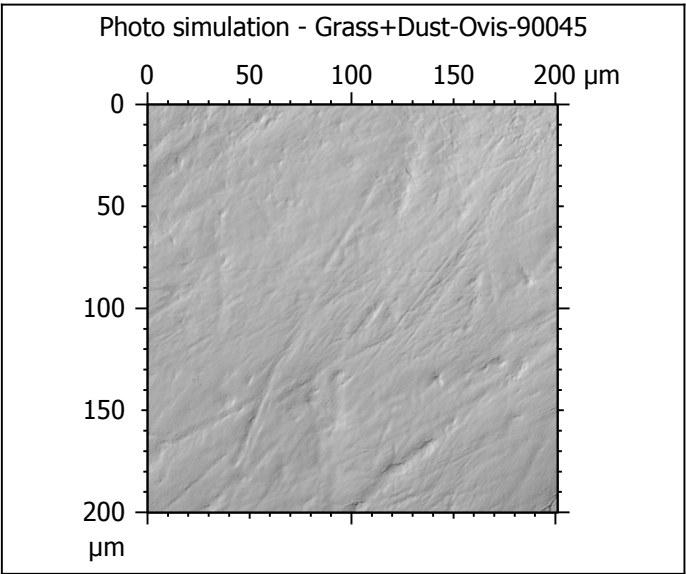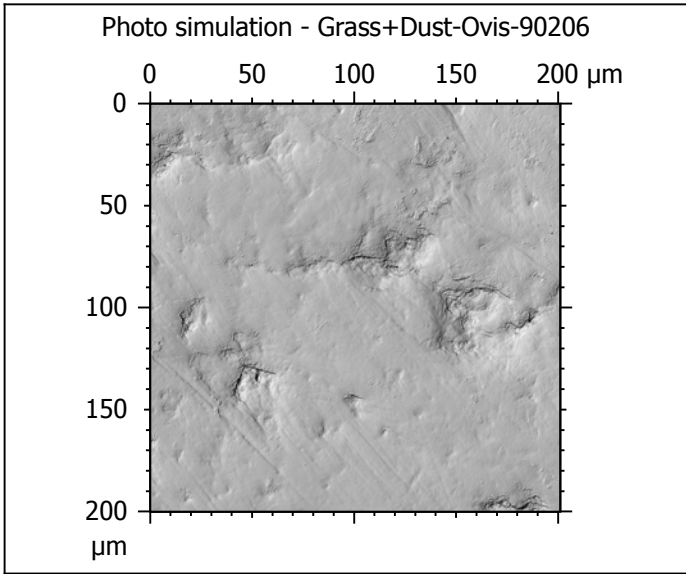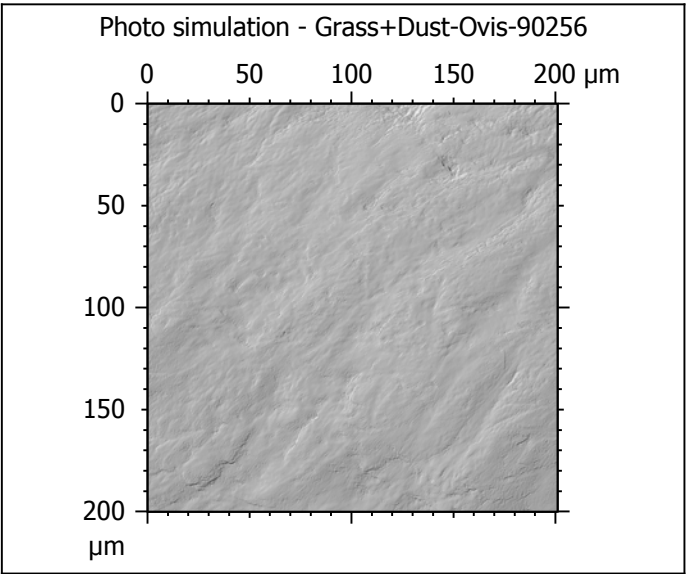





# Grass Dust

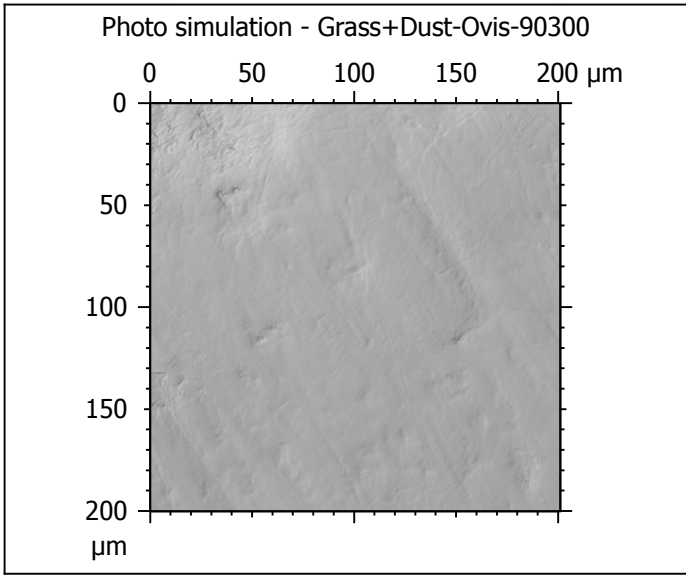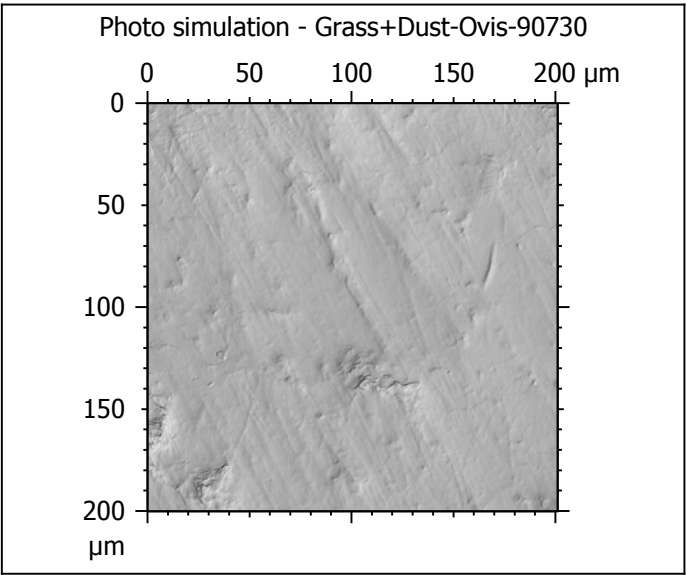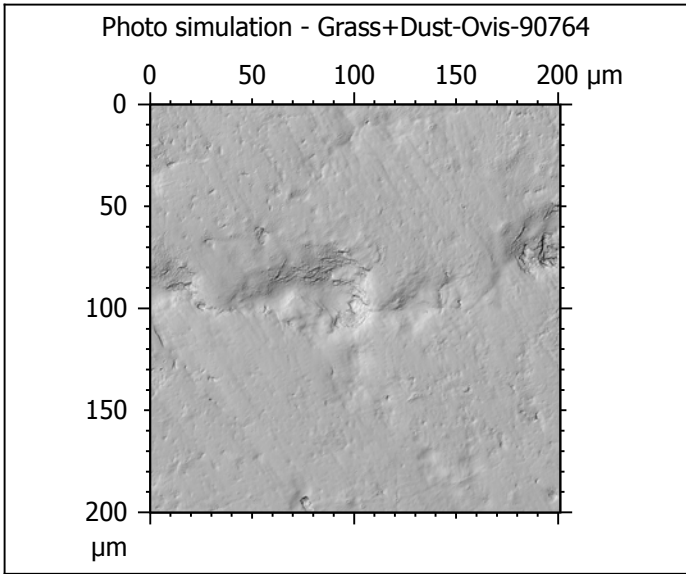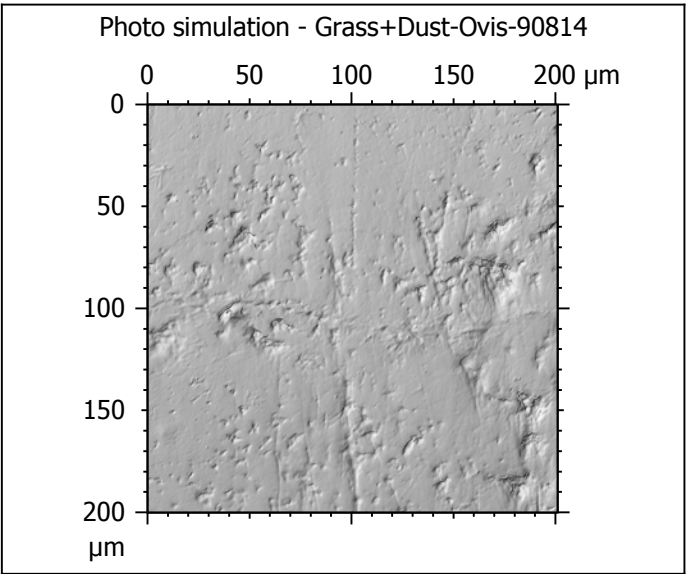

Supplement: rspb20161032supp1.pdf [file rspb20161032supp1.pdf]
